# Supplementary material for: Preventing Staphylococci Surgical Site Infections with a Nitric Oxide-Releasing Poly(lactic acid-co-glycolic acid) Suture Material
Source: PubMed Central journal article supplement (PMC11110049; doi:10.1021/acsabm.4c00128), 2024-04-23
Supplement: mt4c00128_si_001.pdf [file mt4c00128_si_001.pdf]

## **SUPPORTING INFORMATION**

### **Preventing *Staphylococci* Surgical Site Infections with a Nitric Oxide-Releasing Poly(lactic acid-co-glycolic acid) Suture Material**

*Lauren Griffin*<sup>a</sup>, *Mark Richard Stephen Garren*<sup>a</sup>, *Patrick Maffe*<sup>a</sup>, *Sama Ghalei*<sup>a</sup>, *Elizabeth J. Brisbois*<sup>a</sup>, and *Hitesh Handa*<sup>ab\*</sup>

<sup>a</sup> School of Chemical, Materials and Biomedical Engineering, College of Engineering, University of Georgia, Athens, GA, 30602, USA

<sup>b</sup> Department of Pharmaceutical and Biomedical Sciences, College of Pharmacy, University of Georgia, Athens, GA, 30602, USA

\* Corresponding Author:

Dr. Hitesh Handa

Associate Professor

University of Georgia

302 East Campus Road

Athens, GA, 30602, USA

Telephone: (706) 542-8109

E-mail: [hhanda@uga.edu](mailto:hhanda@uga.edu)

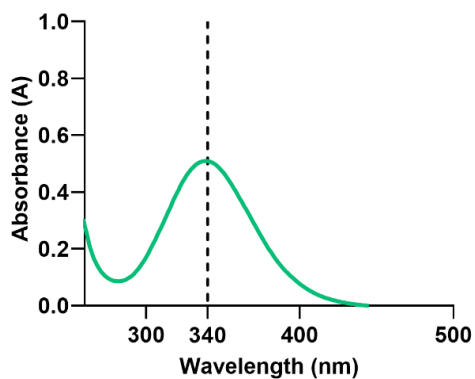

**Figure S1.** Representative UV-vis spectra of SNAP in THF, demonstrating the S-nitrosothiol bond peak on the SNAP molecule at 340 nm (molar absorptivity =  $0.40 \text{ mL mg}^{-1} \text{ mm}^{-1}$ ).

**Table S1.** SNAP loading and leaching for various swelling solution concentrations. Data is represented as mean  $\pm$  SD ( $n = 3$ ).

| Swelling Solution<br>( $\text{mg mL}^{-1}$ ) | SNAP Loading<br>(wt%) | 12 h SNAP Leaching<br>(wt%) |
|----------------------------------------------|-----------------------|-----------------------------|
| 25                                           | $0.73 \pm 0.17$       | $0.52 \pm 0.05$             |
| 50                                           | $1.88 \pm 0.08$       | $1.17 \pm 0.13$             |
| 75                                           | $1.84 \pm 0.07$       | n/a                         |
| 100                                          | $2.09 \pm 0.17$       | n/a                         |

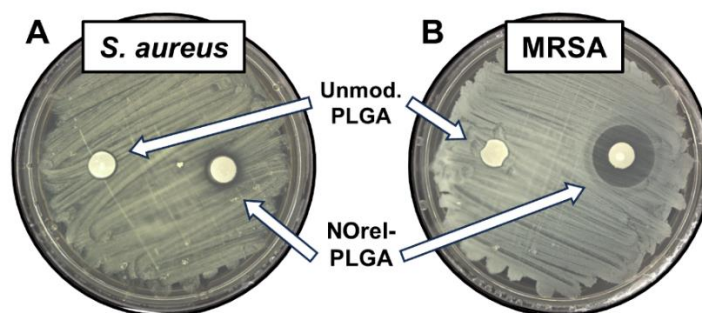

**Figure S2.** Representative images from zone of inhibition assay for (A) *S. aureus* and (B) MRSA. On each agar plate, unmodified PLGA is on the left, and NOrel-PLGA is on the right.

**Table S2.** Planktonic reduction against *S. aureus* and MRSA. Data is represented as mean  $\pm$  SD ( $n = 3$ ).

| Sample                    | Unit                        | <i>S. aureus</i>                  | MRSA                              |
|---------------------------|-----------------------------|-----------------------------------|-----------------------------------|
| <b>Inoculum (Control)</b> | CFU mL <sup>-1</sup>        | 1.88 $\pm$ 0.16 ( $\times 10^7$ ) | 5.02 $\pm$ 0.54 ( $\times 10^7$ ) |
|                           | Log reduction wrt. Control  | n/a                               | n/a                               |
|                           | <i>p</i> value wrt. Control | n/a                               | n/a                               |
| <b>Unmod. PLGA</b>        | CFU mL <sup>-1</sup>        | 1.07 $\pm$ 0.23 ( $\times 10^7$ ) | 3.28 $\pm$ 1.20 ( $\times 10^7$ ) |
|                           | Log reduction wrt. Control  | 0.25                              | 0.18                              |
|                           | <i>p</i> value wrt. Control | 0.3450                            | 0.7766                            |
| <b>NOrel-PLGA</b>         | CFU mL <sup>-1</sup>        | 2.95 $\pm$ 1.60 ( $\times 10^5$ ) | 4.50 $\pm$ 4.06 ( $\times 10^4$ ) |
|                           | Log reduction wrt. Control  | 1.80                              | 3.05                              |
|                           | <i>p</i> value wrt. Control | < 0.0001                          | < 0.0001                          |

**Table S3.** Adhered reduction against *S. aureus* and MRSA. Data is represented as mean  $\pm$  SD ( $n = 3$ ).

| Sample         | Unit                        | <i>S. aureus</i>                  | MRSA                              |
|----------------|-----------------------------|-----------------------------------|-----------------------------------|
| Unmod.<br>PLGA | CFU mL <sup>-1</sup>        | 1.15 $\pm$ 0.17 ( $\times 10^5$ ) | 4.93 $\pm$ 2.04 ( $\times 10^4$ ) |
|                | Log reduction wrt. Control  | n/a                               | n/a                               |
|                | <i>p</i> value wrt. Control | n/a                               | n/a                               |
| NOrel-<br>PLGA | CFU mL <sup>-1</sup>        | 1.06 $\pm$ 0.05 ( $\times 10^4$ ) | 2.75 $\pm$ 1.18 ( $\times 10^2$ ) |
|                | Log reduction wrt. Control  | 1.03                              | 2.25                              |
|                | <i>p</i> value wrt. Control | < 0.0001                          | < 0.0001                          |

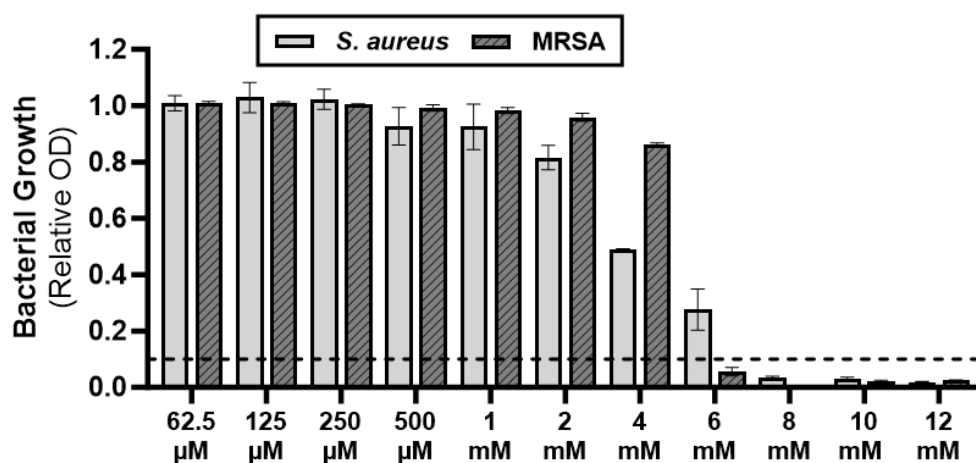

**Figure S3.** MIC results for SNAP against *S. aureus* and MRSA. Data is represented as mean  $\pm$  SD ( $n = 3$ ).
